# Supplementary material for: Influence of ZIF-9 and ZIF-12 structure on the formation of a series of new Co/N-doped porous carbon composites as anode electrodes for high-performance lithium-ion batteries
Source: Royal Society of Chemistry journal article supplement (doi:10.1039/d3ra02802j), 2023-01-01
Supplement: d3ra02802j1.pdf [file d3ra02802j1.pdf]

# Supporting information

## **Influence of ZIF-9 and ZIF-12 structure on the formation of a series of new Co/N-doped porous carbon composites as anode electrodes for high-performance lithium-ion batteries**

Anh T. A. Duong,<sup>a</sup> Hoang V. Nguyen,<sup>b,c</sup> Man V. Tran,<sup>b,c</sup> Quynh N. Ngo,<sup>a</sup> Loc C. Luu,<sup>d</sup>  
Tan L. H. Doan,<sup>e,f</sup> Hung N. Nguyen<sup>a</sup> and My V. Nguyen<sup>\*,a</sup>

<sup>a</sup>Faculty of Chemistry, Ho Chi Minh City University of Education, Ho Chi Minh City 700000, Vietnam.

<sup>b</sup>Applied Physical Chemistry Laboratory (APCLAB), VNUHCM-University of Science, Ho Chi Minh City 700000, Vietnam.

<sup>c</sup>Department of Physical Chemistry, Faculty of Chemistry, VNUHCM-University of Science, Ho Chi Minh City 700000, Vietnam.

<sup>d</sup>HCMC University of Technology, VNU-HCM, 268 Ly Thuong Kiet, District 10, Ho Chi Minh City, Vietnam.

<sup>e</sup>Center for Innovative Materials and Architectures (INOMAR), Ho Chi Minh City, Viet Nam.

<sup>f</sup>Vietnam National University, Ho Chi Minh City, Vietnam.

\*To whom correspondence should be addressed: [mynv@hcmue.edu.vn](mailto:mynv@hcmue.edu.vn)

---

## Table of Contents

---

|                   |                                                                                                          |                |
|-------------------|----------------------------------------------------------------------------------------------------------|----------------|
| <b>Section S1</b> | <i>Fourier Transform Infrared Spectroscopy (FT-IR)</i>                                                   | <b>S3-S4</b>   |
| <b>Section S2</b> | <i>Thermogravimetric analysis (TGA) and Differential scanning calorimetry (DSC) curves</i>               | <b>S5-S6</b>   |
| <b>Section S3</b> | <i>N<sub>2</sub> adsorption-desorption measurement of Co/CZIF-9 and Co/CZIF-12 materials</i>             | <b>S7-S9</b>   |
| <b>Section S4</b> | <i>Energy-dispersive X-ray mapping (EDX-mapping) and transmission electron microscopy (TEM) analysis</i> | <b>S10-S12</b> |
| <b>Section S5</b> | <i>The electrochemical measurements of Co/CZIF-9 and Co/CZIF-12 materials</i>                            | <b>S13-S20</b> |

---

## Section S1. Fourier Transform Infrared Spectroscopy (FT-IR)

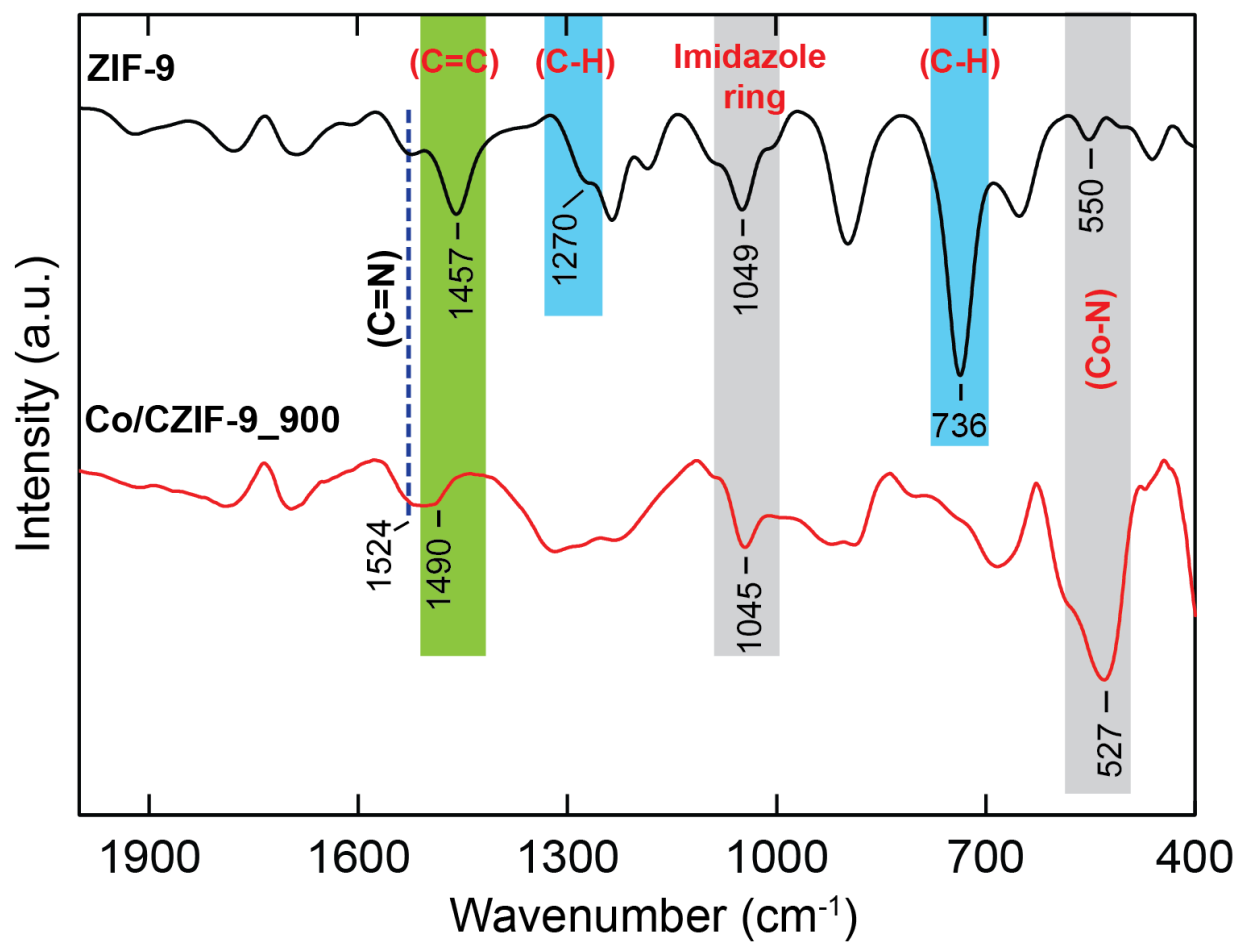

**Figure S1.** FT-IR spectra of activated ZIF-9 (black) in comparison with Co/CZIF-9\_900 (red).

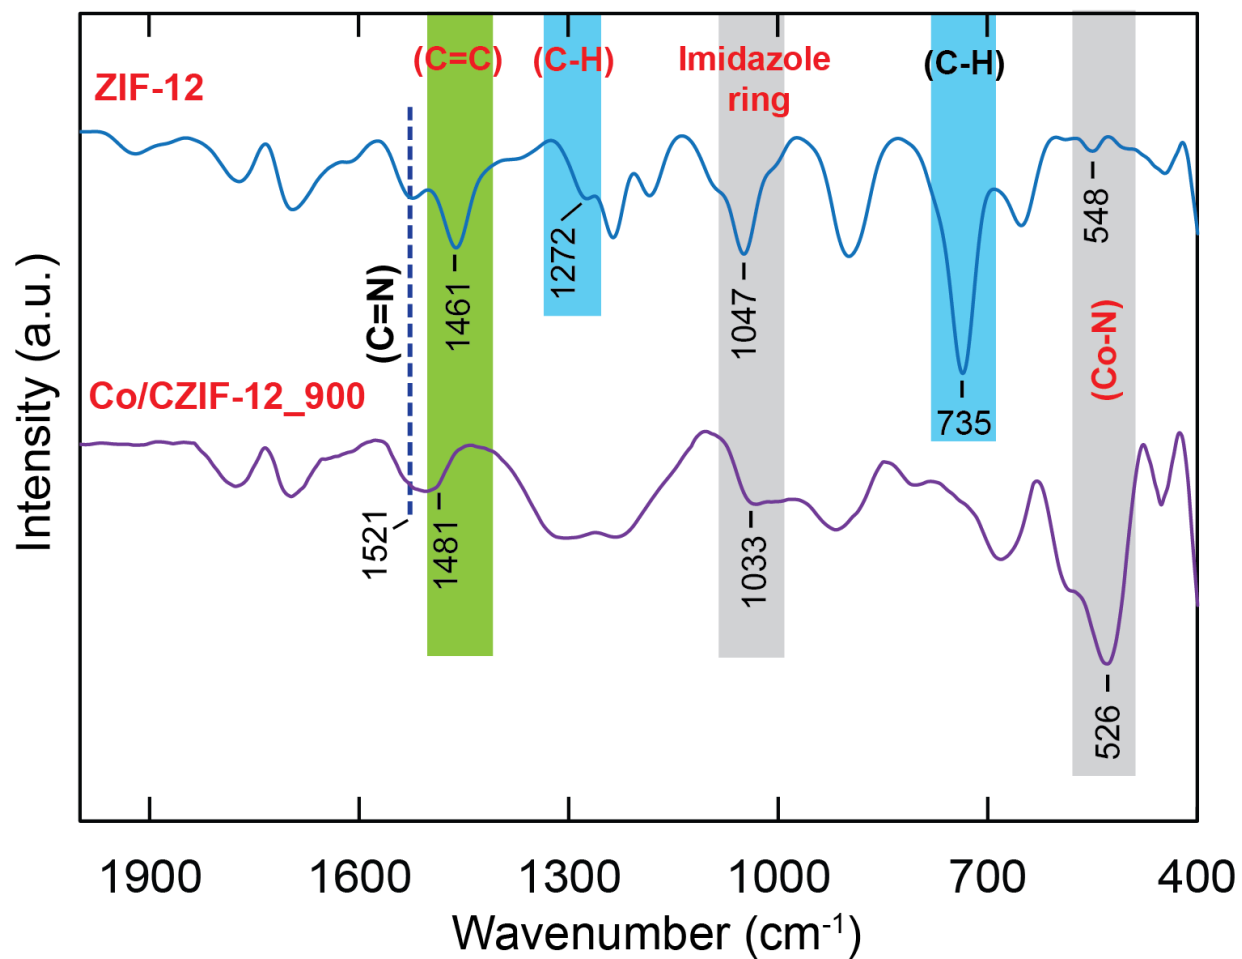

**Figure S2.** FT-IR spectra of activated ZIF-12 (blue) in comparison with Co/CZIF-12\_900 (purple).

**Section S2.** Thermogravimetric analysis (TGA) and Differential scanning calorimetry (DSC) curves

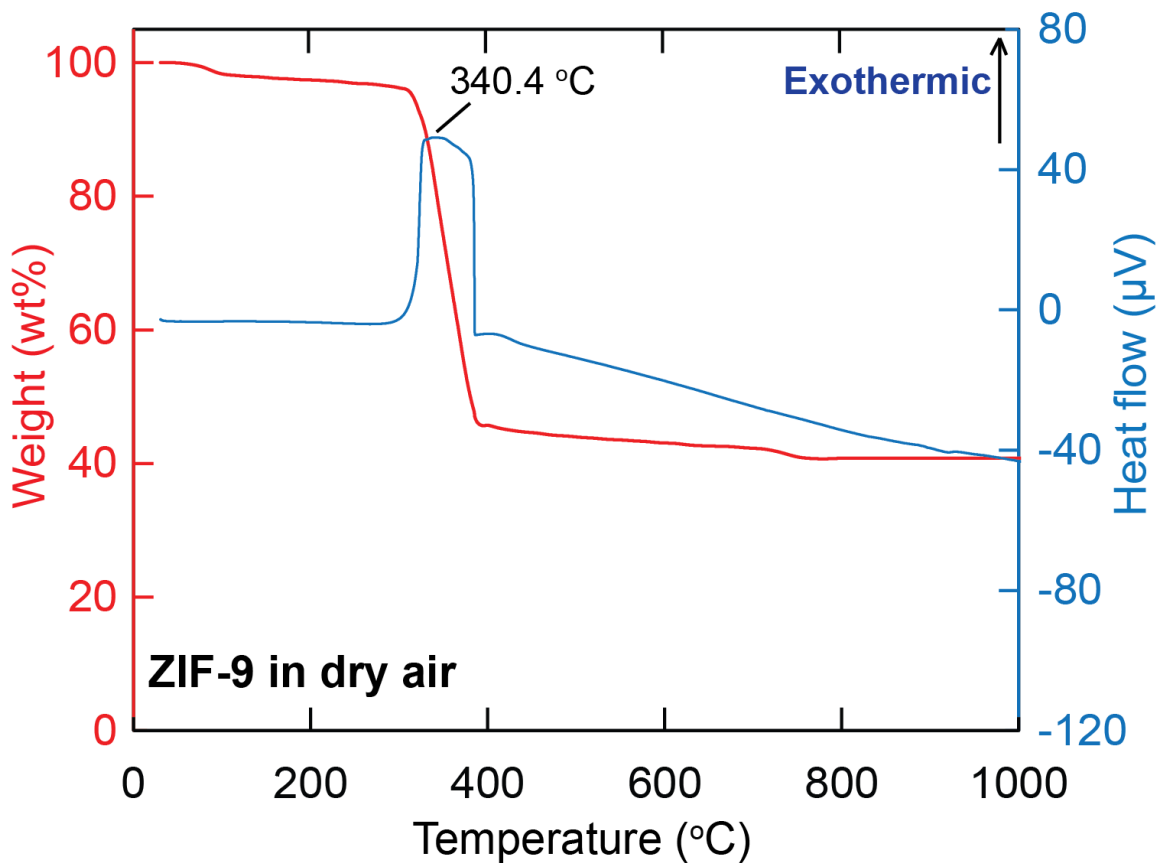

**Figure S3.** TGA-DSC curve of the activated ZIF-9 annealed in dry air. Herein, we further performed thermogravimetric analysis combined with differential scanning calorimetry (TGA-DSC) for ZIF-9 under dry air (80% N<sub>2</sub>, 20% O<sub>2</sub>). Specifically, the framework of ZIF-9 is confirmed to be thermally stable > 320 °C with a specific exothermic peak at 340.4 °C.

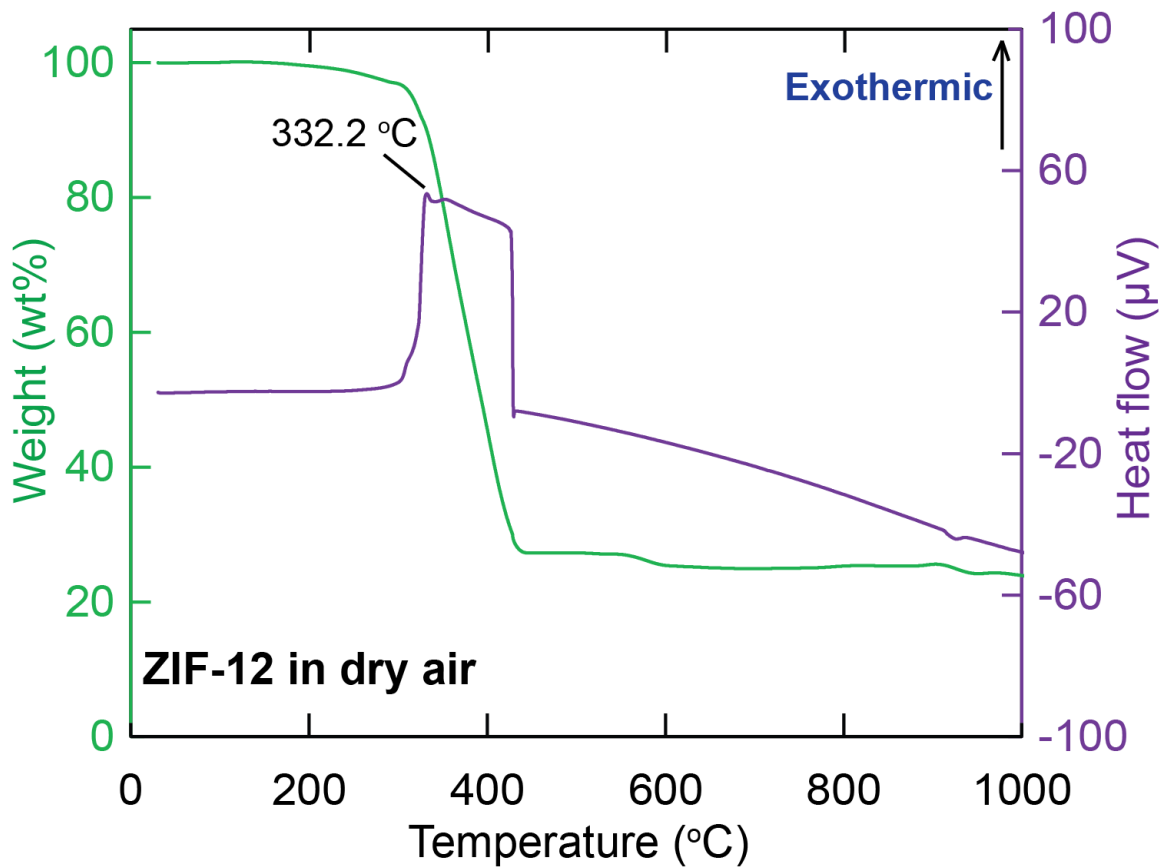

**Figure S4.** TGA-DSC curve of the activated ZIF-12 annealed in dry air. Herein, we further performed thermogravimetric analysis combined with differential scanning calorimetry (TGA-DSC) for ZIF-12 under dry air (80% N<sub>2</sub>, 20% O<sub>2</sub>). In detail, the framework of ZIF-12 is confirmed to be thermally stable > 320 °C with a specific exothermic peak at 332.2 °C.

**Section S3.** N<sub>2</sub> adsorption-desorption measurement of Co/CZIF-9 and Co/CZIF-12 materials

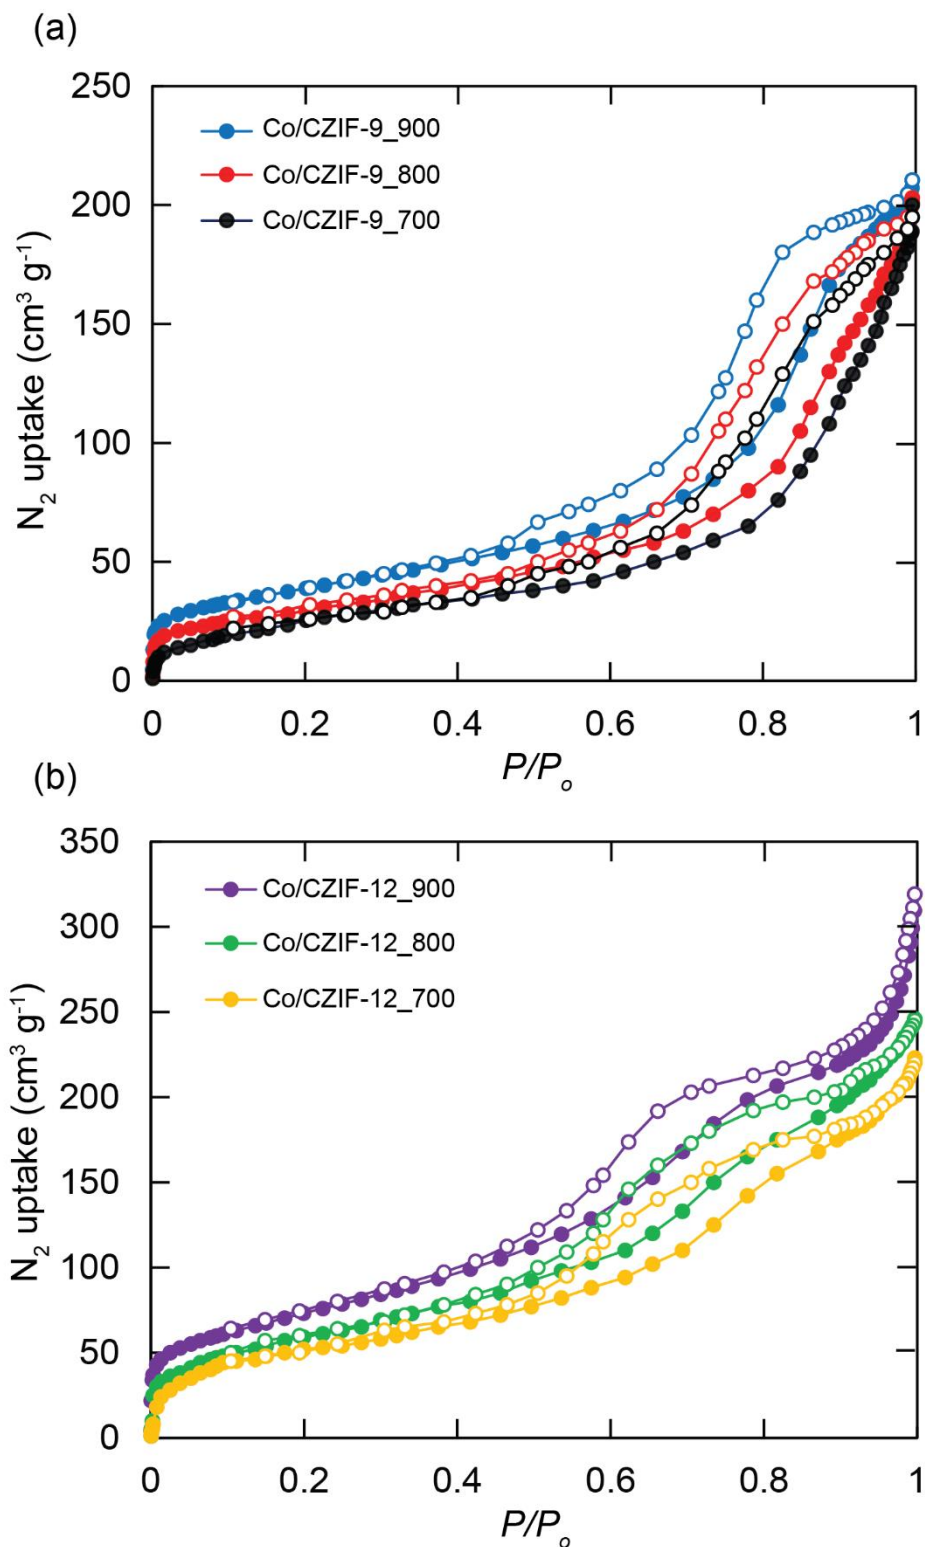

**Figure S5.** N<sub>2</sub> adsorption-desorption isotherm of Co/CZIF-9 (a) and Co/CZIF-12 (b) annealed at 700, 800, and 900 °C

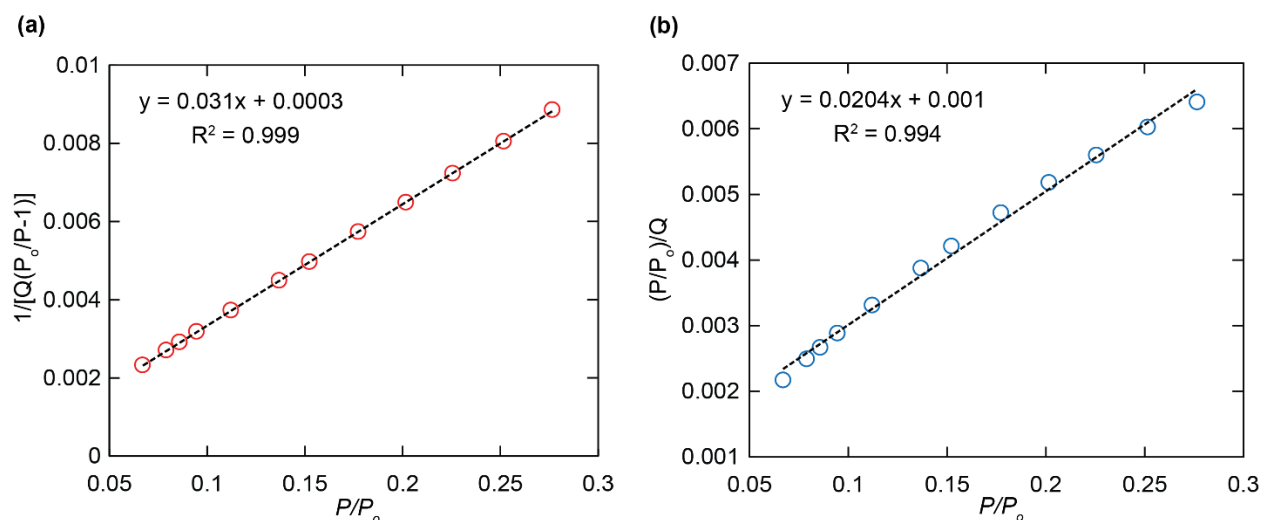

(c)

| Parameters                                            | BET model     | Langmuir model |
|-------------------------------------------------------|---------------|----------------|
| P/P <sub>0</sub> range                                | 0.067 - 0.277 | 0.067 - 0.277  |
| Correlation Coefficient                               | 0.999         | 0.994          |
| C                                                     | 123.28        | 20.40          |
| Q <sub>m</sub> (cm <sup>3</sup> g <sup>-1</sup> STP)  | 31.974        | 49.020         |
| Molecular cross-sectional area (S / nm <sup>2</sup> ) | 0.1620        | 0.1620         |
| Surface area (m <sup>2</sup> g <sup>-1</sup> )        | 139.17        | 213.42         |

$$S = \frac{Q_m \times N_A \times A}{V}$$

Where S and Q<sub>m</sub> are the BET or Langmuir surface area and quantity adsorbed. N<sub>A</sub> is Avogadro's number, A is the molecular-sectional area and V symbolizes the molar volume of adsorbed gas.

**Figure S6.** Plot of the linear region of the adsorption N<sub>2</sub> isotherm of Co/CZIF-9\_900 used for the BET equation (a), the Langmuir equation (b), and summary of parameters in the BET and Langmuir analysis (c).



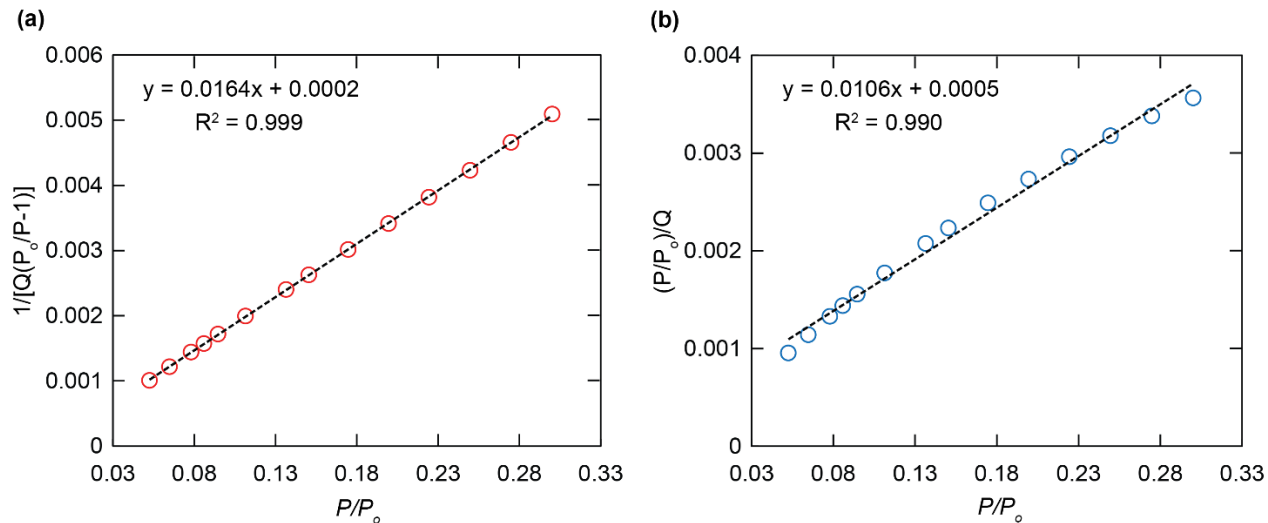

(c)

| Parameters                                            | BET model     | Langmuir model |
|-------------------------------------------------------|---------------|----------------|
| P/P <sub>0</sub> range                                | 0.053 - 0.300 | 0.053 - 0.300  |
| Correlation Coefficient                               | 0.999         | 0.990          |
| C                                                     | 103.30        | 21.20          |
| Q <sub>m</sub> (cm <sup>3</sup> g <sup>-1</sup> STP)  | 60.532        | 94.340         |
| Molecular cross-sectional area (S / nm <sup>2</sup> ) | 0.1620        | 0.1620         |
| Surface area (m <sup>2</sup> g <sup>-1</sup> )        | 263.47        | 410.73         |

$$S = \frac{Q_m \times N_A \times A}{V}$$

Where S and Q<sub>m</sub> are the BET or Langmuir surface area and quantity adsorbed. N<sub>A</sub> is Avogadro's number, A is the molecular-sectional area and V symbolizes the molar volume of adsorbed gas.

**Figure S7.** Plot of the linear region of the adsorption N<sub>2</sub> isotherm of Co/CZIF-12\_900 used for the BET equation (a), the Langmuir equation (b), and summary of parameters in the BET and Langmuir analysis (c).

**Section S4.** Energy-dispersive X-ray mapping (EDX-mapping) and transmission electron microscopy (TEM) analysis

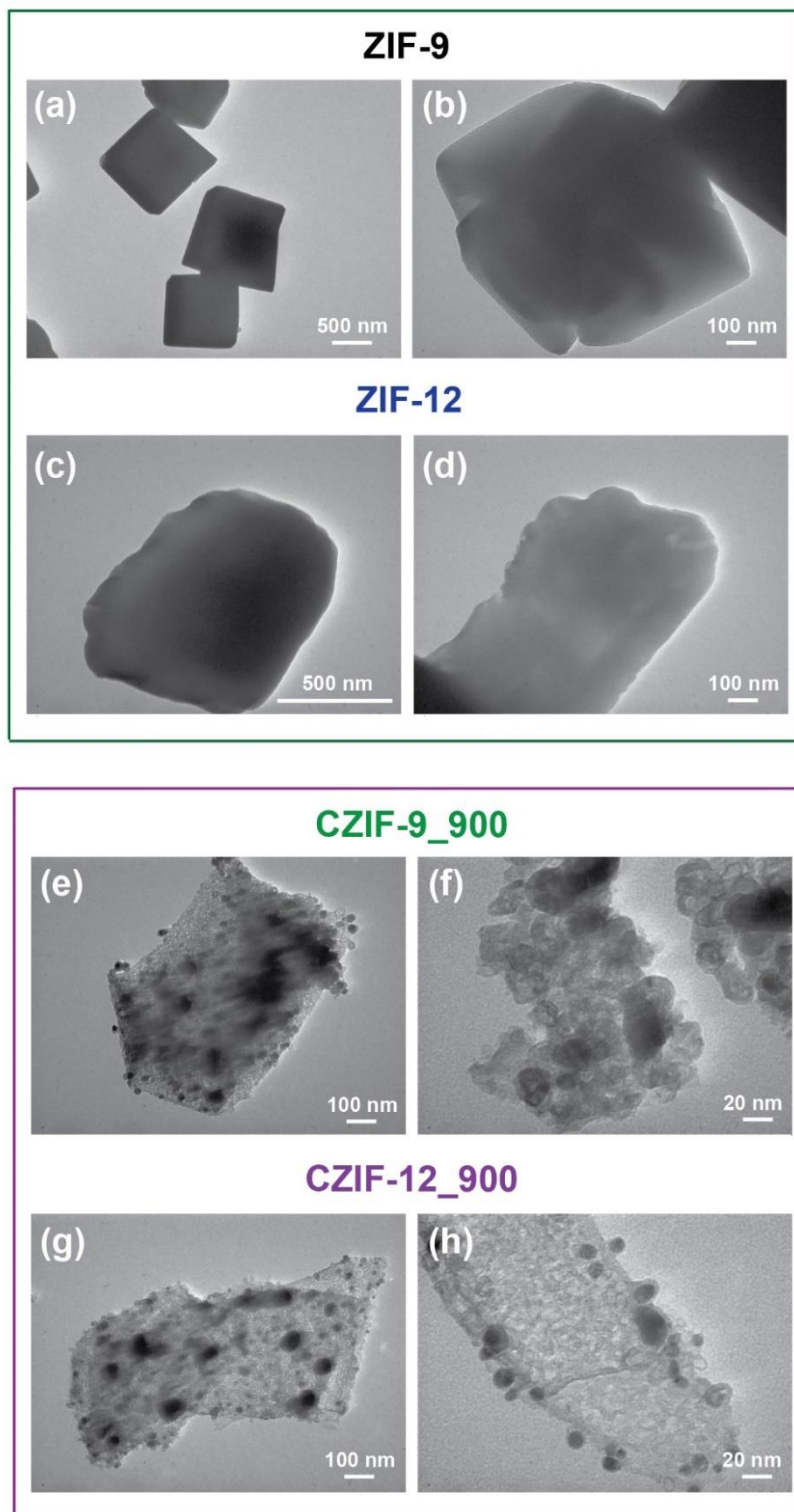

**Figure S8.** TEM images of ZIF-9 (a and b), ZIF-12 (c and d), Co/CZIF-9\_900 (e and f), and Co/CZIF-12\_900 (g and h).

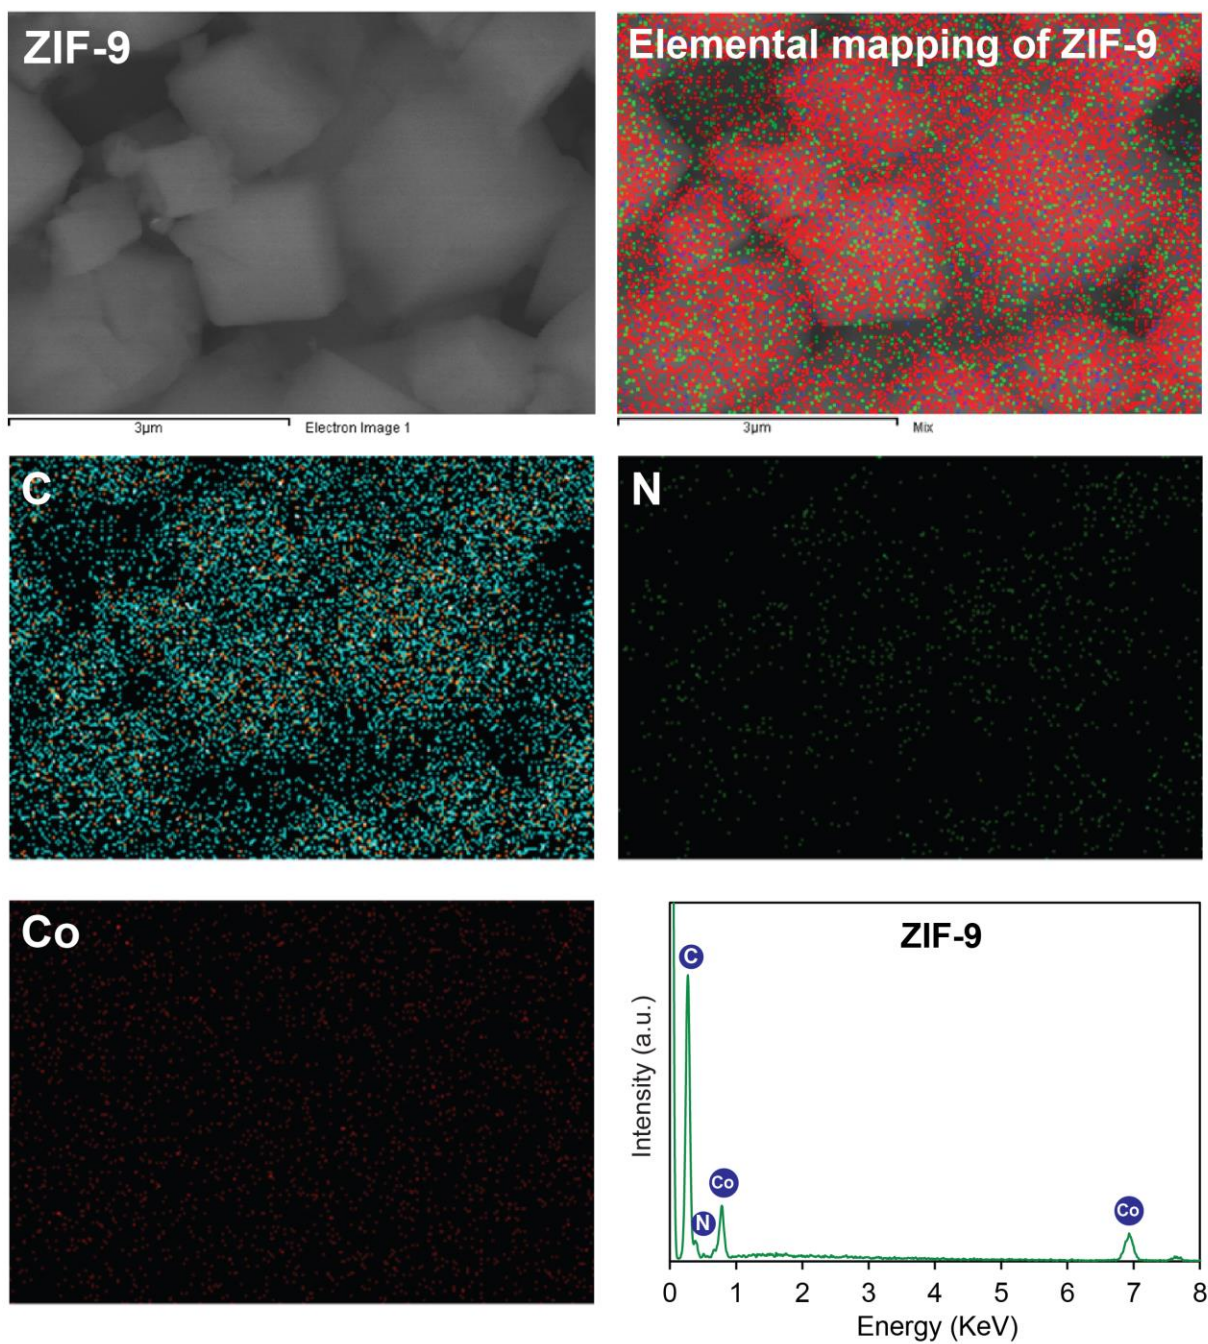

**Figure S9.** Elemental mapping by SEM-EDX of ZIF-9.



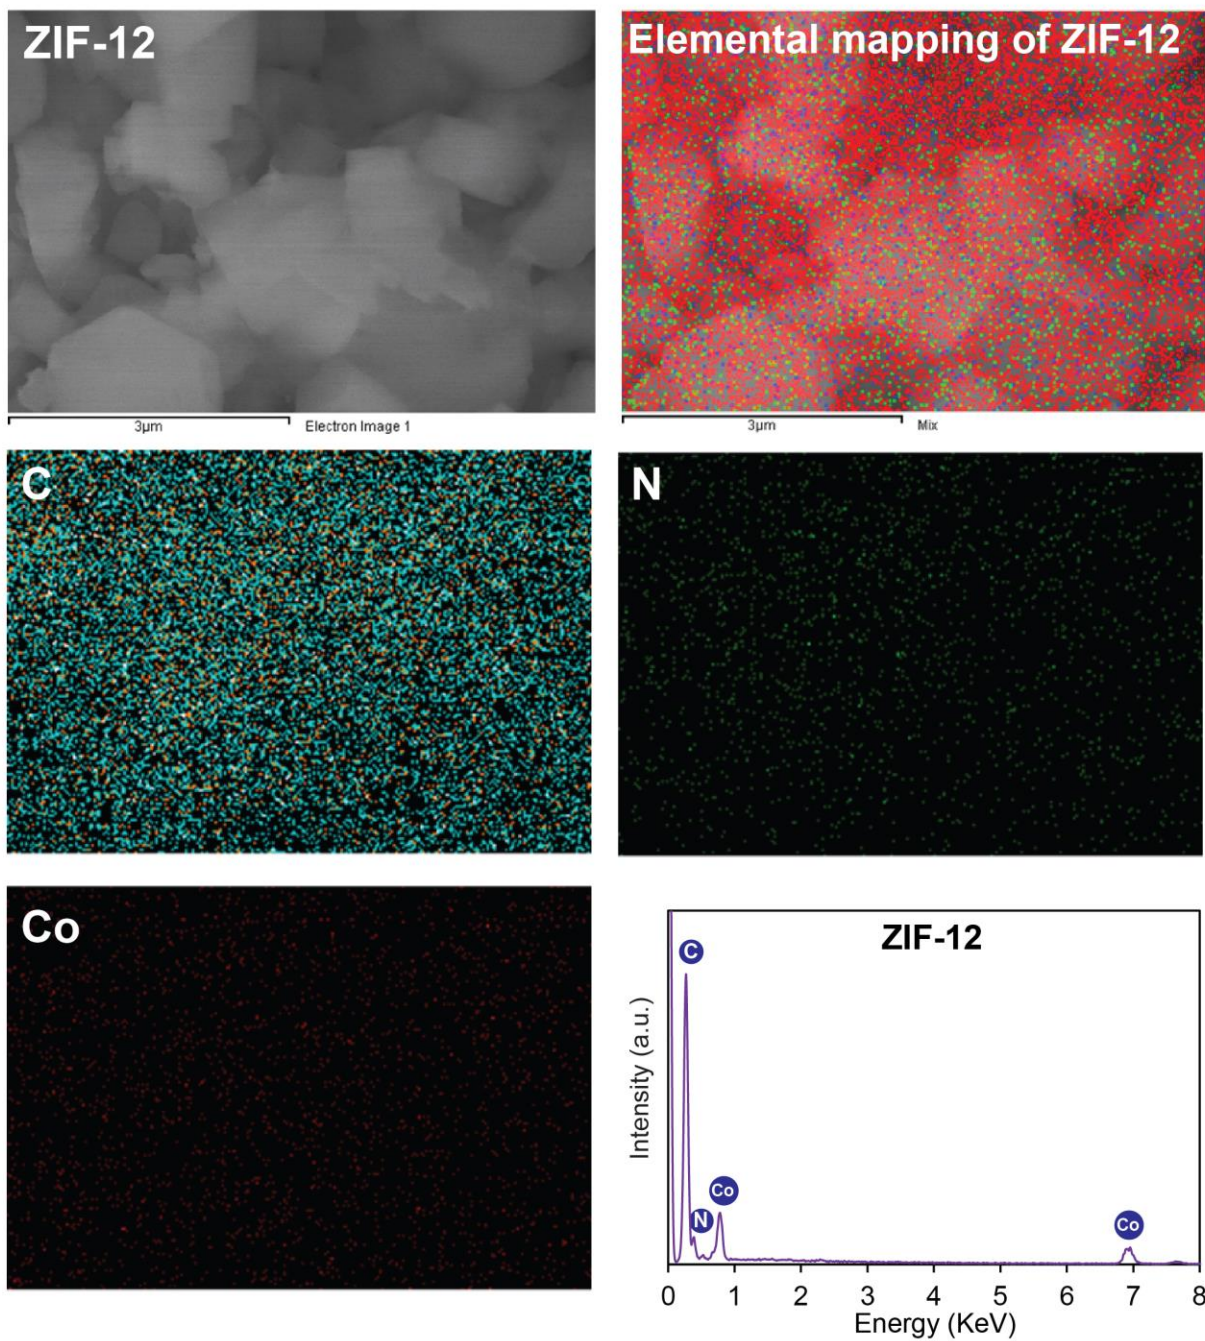

**Figure S10.** Elemental mapping by SEM-EDX of ZIF-12.

**Section S5.** The electrochemical measurements of Co/CZIF-9 and Co/CZIF-12 materials

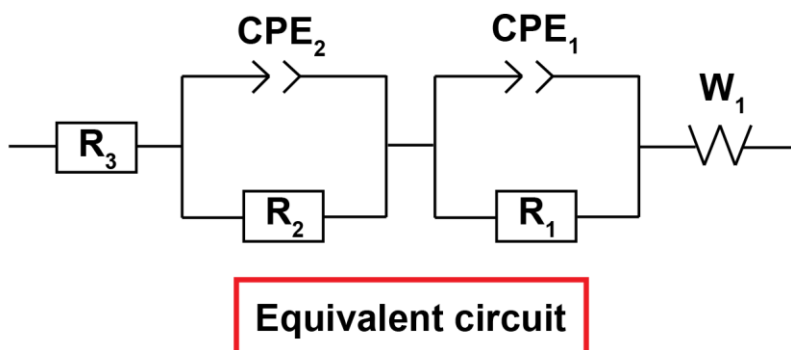

**Figure S11.** An equivalent circuit used for fitting. Schematic representations:  $R_1/R_2/R_3$ , the resistance of charge transfer, the resistor of the SEI film and the internal resistor of the battery;  $CPE_1/CPE_2$ , the constant phase element of the electrode/electrolyte interface and the SEI layer;  $W_1$ , Warburg diffusion element.

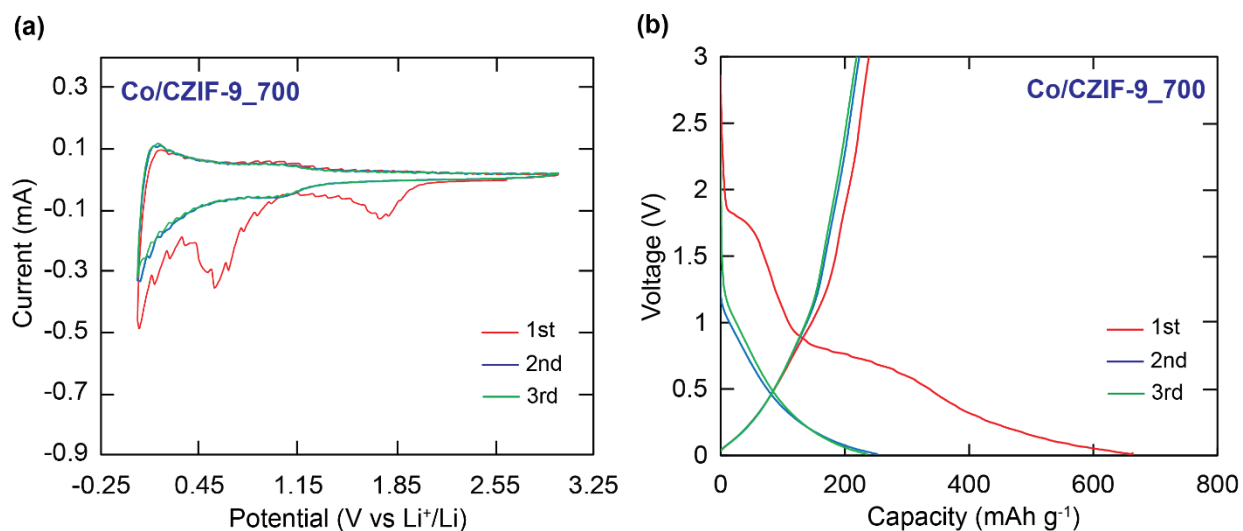

**Figure S12.** The first three CV curves of Co/CZIF-9\_700 at a scan rate of 0.1 mV s<sup>-1</sup> in the potential range of 0.01-3.0 V (a); The discharge/charge curves of Co/CZIF-9\_700 at a current density of 0.1 A g<sup>-1</sup> for the three cycles (b).

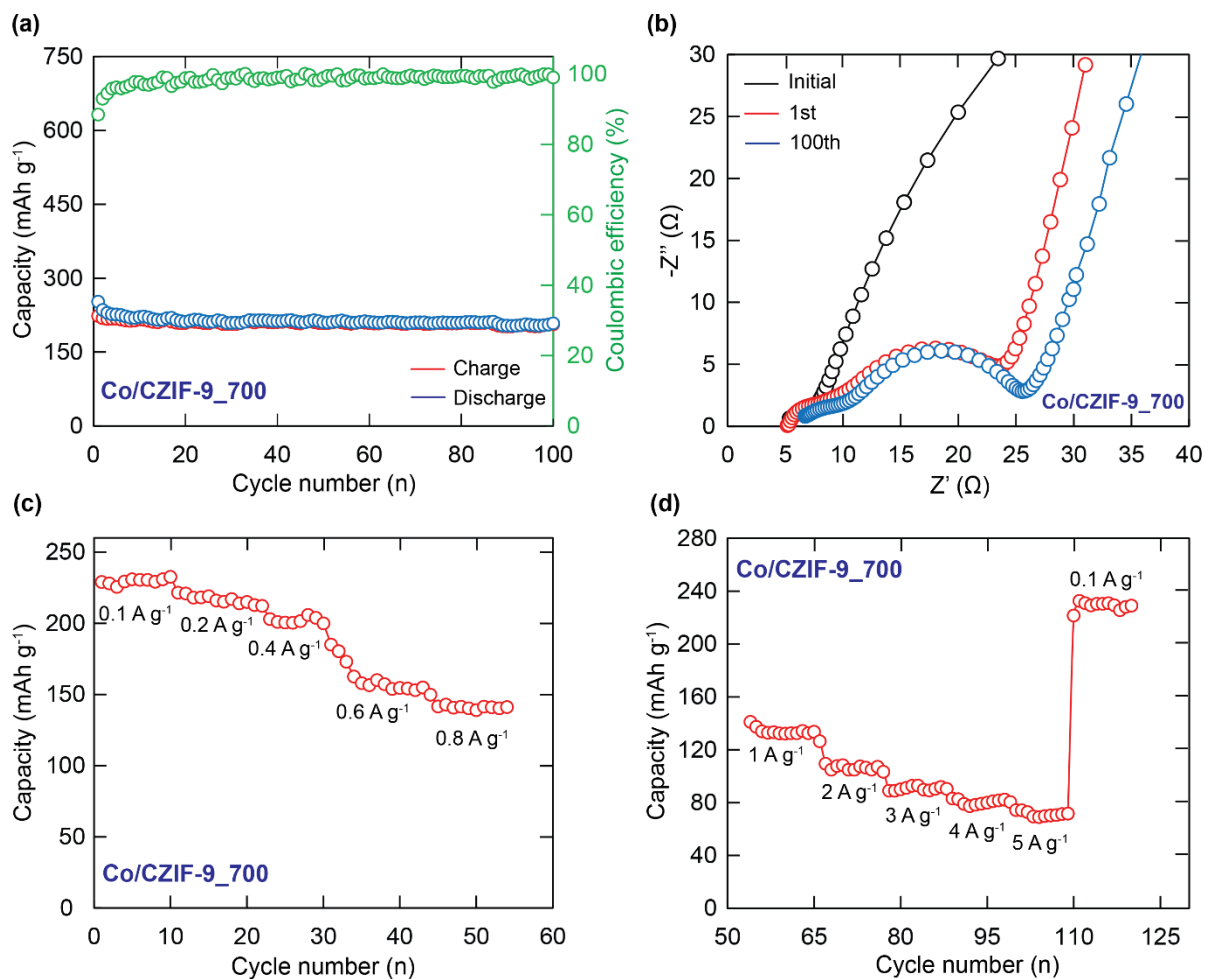

**Figure S13.** Cycle-life property of Co/CZIF-9\_700 at a current density of 0.1 A g<sup>-1</sup> over 100 cycles (a); The Nyquist plots of Co/CZIF-9\_700 material (b); Rate performance of Co/CZIF-9\_700 at various current density (c) and (d).

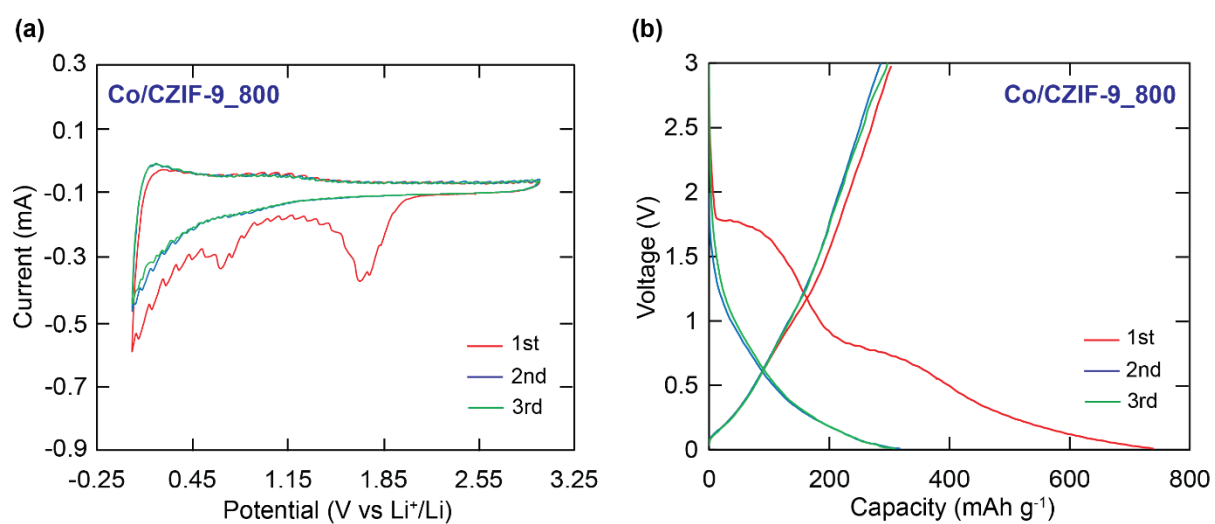

**Figure S14.** The first three CV curves of Co/CZIF-9\_800 at a scan rate of  $0.1 \text{ mV s}^{-1}$  in the potential range of 0.01-3.0 V (a); The discharge/charge curves of Co/CZIF-9\_800 at a current density of  $0.1 \text{ A g}^{-1}$  for the three cycles (b).

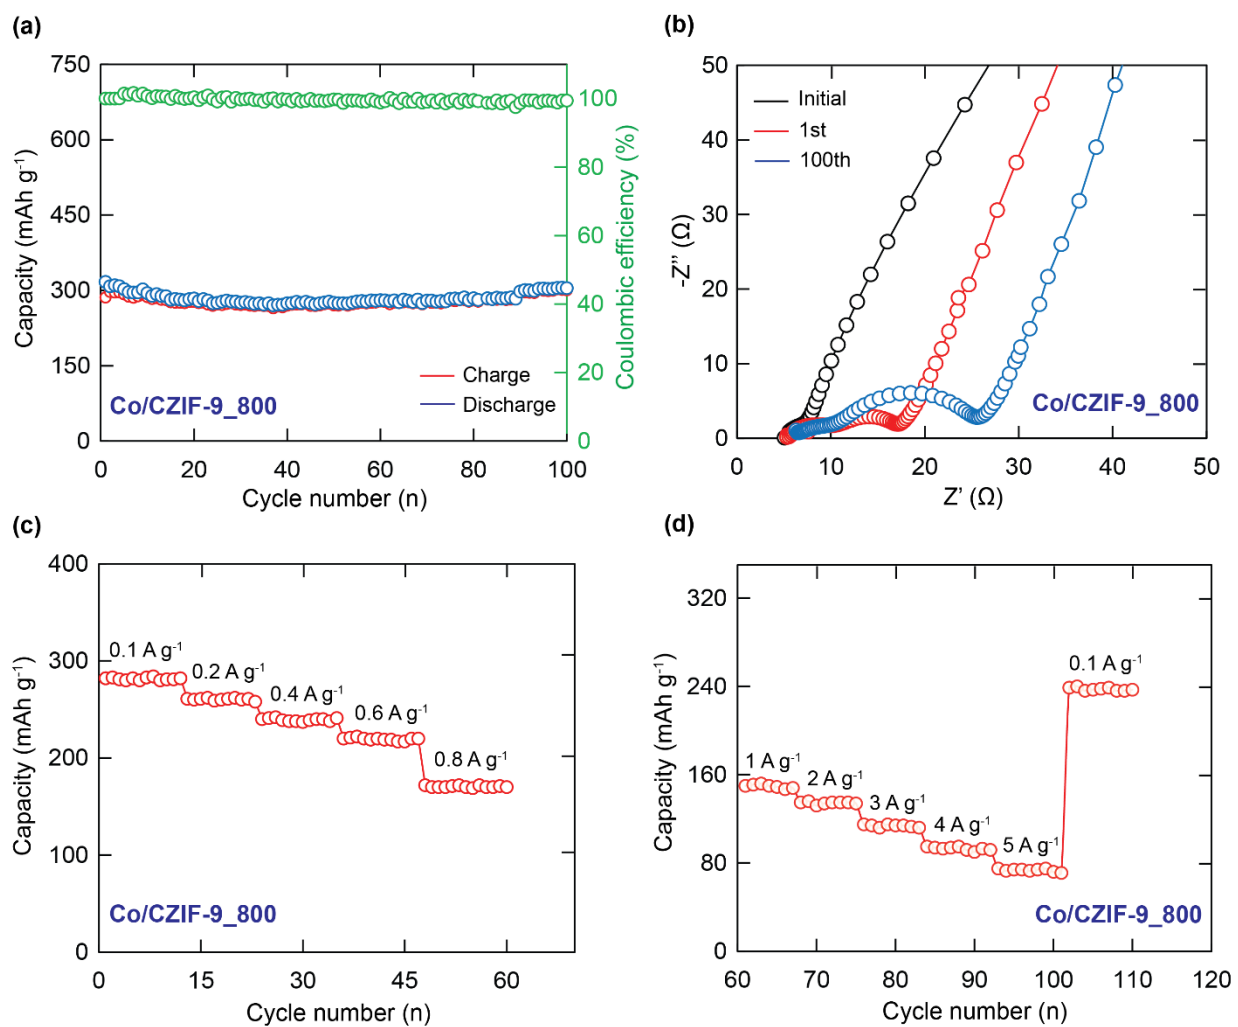

**Figure S15.** Cycle-life property of Co/CZIF-9\_800 at a current density of 0.1 A g<sup>-1</sup> over 100 cycles (a); The Nyquist plots of Co/CZIF-9\_800 material (b); Rate performance of Co/CZIF-9\_800 at various current density (c) and (d).



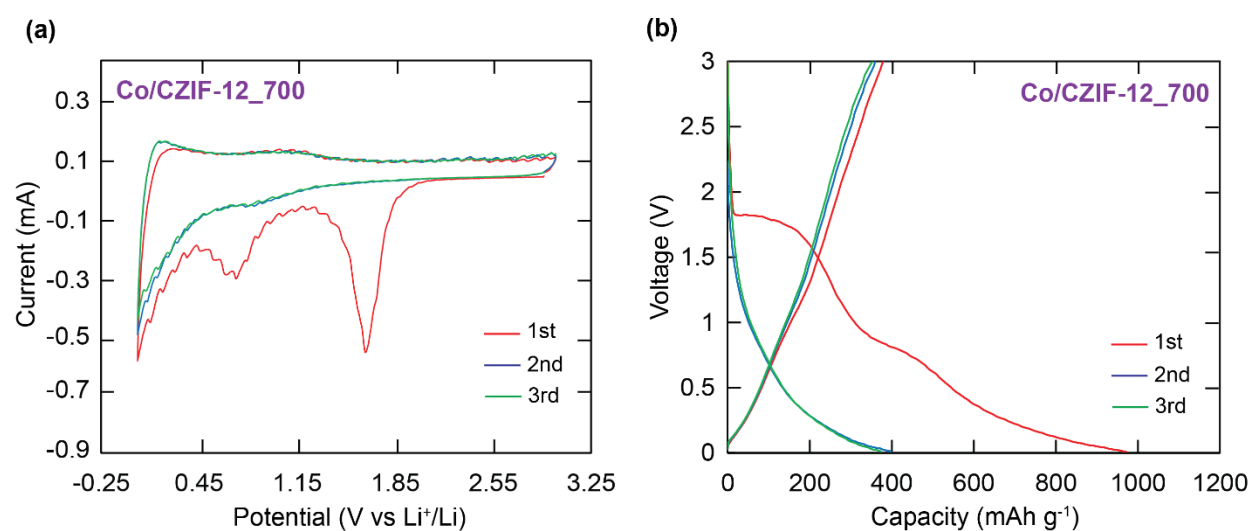

**Figure S16.** The first three CV curves of Co/CZIF-12\_700 at a scan rate of  $0.1 \text{ mV s}^{-1}$  in the potential range of 0.01-3.0 V (a); The discharge/charge curves of Co/CZIF-12\_700 at a current density of  $0.1 \text{ A g}^{-1}$  for the three cycles (b).

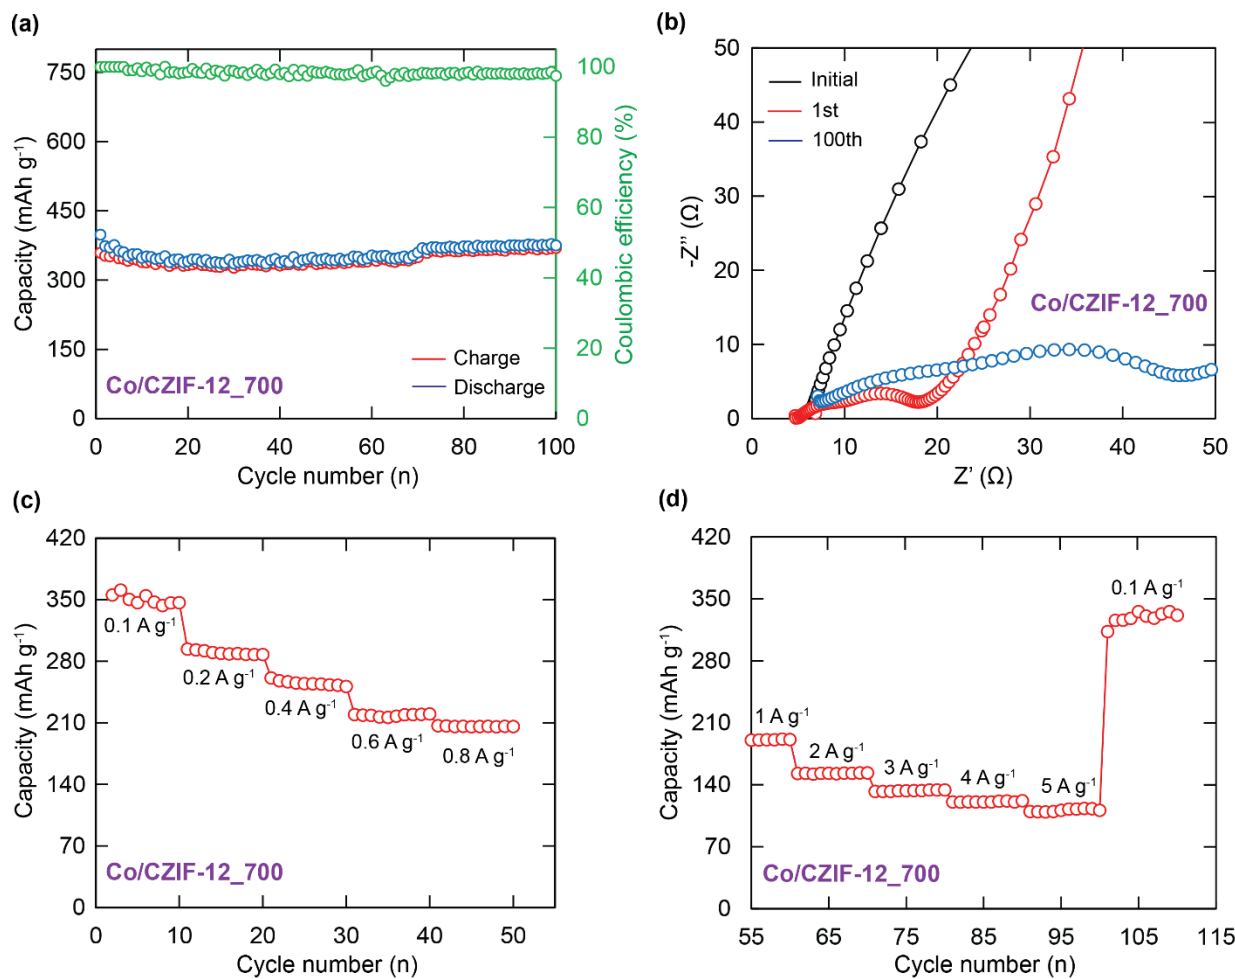

**Figure S17.** Cycle-life property of Co/CZIF-12\_700 at a current density of  $0.1 \text{ A g}^{-1}$  over 100 cycles (a); The Nyquist plots of Co/CZIF-12\_700 material (b); Rate performance of Co/CZIF-12\_700 at various current density (c) and (d).

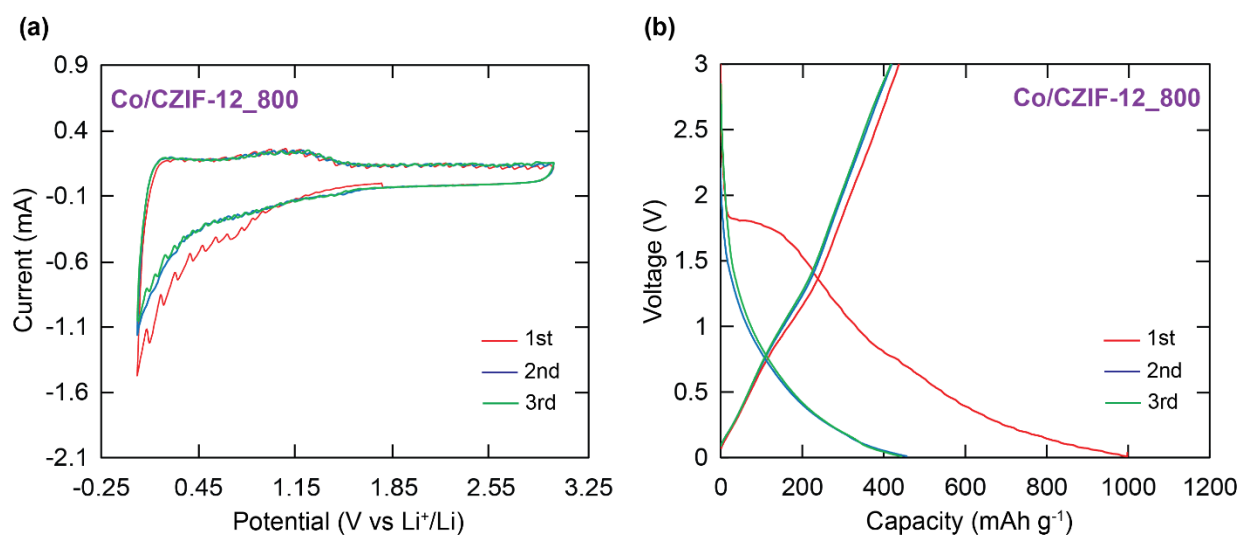

**Figure S18.** The first three CV curves of Co/CZIF-12\_800 at a scan rate of 0.1 mV s<sup>-1</sup> in the potential range of 0.01-3.0 V (a); The discharge/charge curves of Co/CZIF-12\_800 at a current density of 0.1 A g<sup>-1</sup> for the three cycles (b).

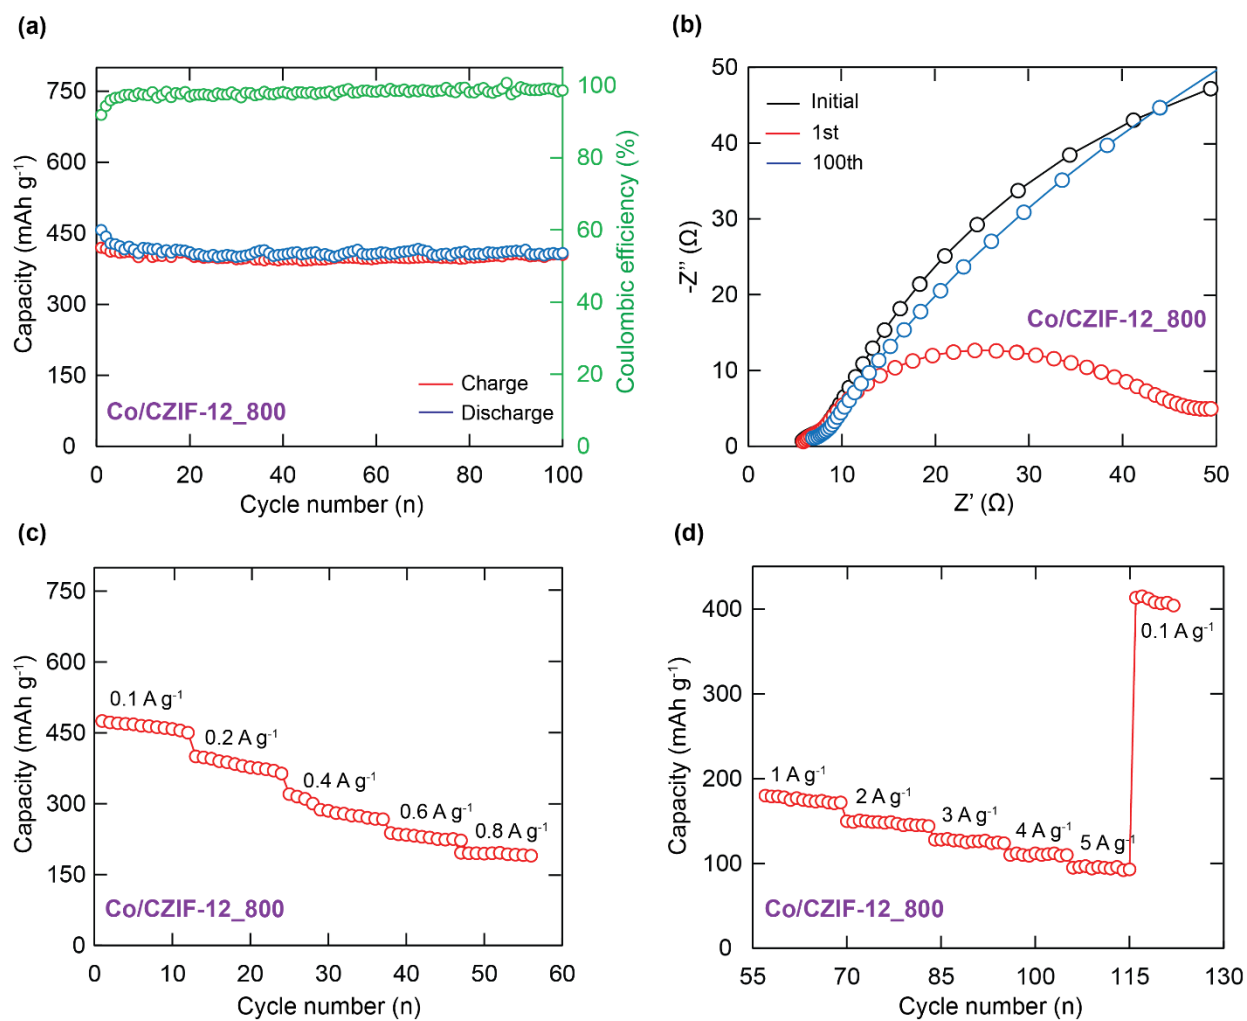

**Figure S19.** Cycle-life property of Co/CZIF-12\_800 at a current density of 0.1 A g<sup>-1</sup> over 100 cycles (a); The Nyquist plots of Co/CZIF-12\_800 material (b); Rate performance of Co/CZIF-12\_800 at various current density (c) and (d).
